# Supplementary material
Source: publisher site journal article supplement (https://www.dovepress.com/get_supplementary_file.php?f=209571a.xlsx)
Supplement: Supplementary file 1 [file get_supplementary_file.php]

## Sheet: Sheet1
Gene	Gene Name	Pathway	Function	Checkpoint Regulation
CD38	CD38 molecule	Adhesion_migration	Tumor_characterization	NA
ITGAE	integrin subunit alpha E	Adhesion_migration	Tumor_characterization	NA
ADGRE5	adhesion G protein-coupled receptor E5	Adhesion_migration	Tumor_characterization	NA
CD44	CD44 molecule Indian blood group	Adhesion_migration	Tumor_characterization	NA
CD53	CD53 molecule	Adhesion_migration	Tumor_characterization	NA
CD226	CD226 molecule	Adhesion_migration	Tumor_characterization	NA
CD47	CD47 molecule	Adhesion_migration	Tumor_characterization	NA
IGF1R	insulin like growth factor 1 receptor	Adhesion_migration	Tumor_characterization	NA
PECAM1	platelet and endothelial cell adhesion molecule 1	Adhesion_migration	Tumor_characterization	NA
ITGB1	integrin subunit beta 1	Adhesion_migration	Tumor_characterization	NA
NCAM1	neural cell adhesion molecule 1	Adhesion_migration	Tumor_characterization	NA
ITGA1	integrin subunit alpha 1	Adhesion_migration	Tumor_characterization	NA
MADCAM1	mucosal vascular addressin cell adhesion molecule 1	Adhesion_migration	Tumor_characterization	NA
NECTIN2	nectin cell adhesion molecule 2	Adhesion_migration	Tumor_characterization	NA
CD83	CD83 molecule	Antigen_presentation	Lymphocyte_regulation	NA
CD1D	CD1d molecule	Antigen_presentation	Lymphocyte_regulation	NA
CD1C	CD1c molecule	Antigen_presentation	Lymphocyte_regulation	NA
HLA-E	major histocompatibility complex class I E	Antigen_processing	Lymphocyte_regulation	NA
HLA-DMA	major histocompatibility complex class II DM alpha	Antigen_processing	Lymphocyte_regulation	NA
HLA-F	major histocompatibility complex class I F	Antigen_processing	Lymphocyte_regulation	NA
HLA-C	major histocompatibility complex class I C	Antigen_processing	Lymphocyte_regulation	NA
HLA-DRA	major histocompatibility complex class II DR alpha	Antigen_processing	Lymphocyte_regulation	NA
HLA-DPB1	major histocompatibility complex class II DP beta 1	Antigen_processing	Lymphocyte_regulation	NA
HLA-F-AS1	HLA-F antisense RNA 1	Antigen_processing	Lymphocyte_regulation	NA
CD74	CD74 molecule	Antigen_processing	Lymphocyte_regulation	NA
HLA-DOB	major histocompatibility complex class II DO beta	Antigen_processing	Lymphocyte_regulation	NA
HLA-DOA	major histocompatibility complex class II DO alpha	Antigen_processing	Lymphocyte_regulation	NA
HLA-A	major histocompatibility complex class I A	Antigen_processing	Lymphocyte_regulation	NA
HLA-DQB2	major histocompatibility complex class II DQ beta 2	Antigen_processing	Lymphocyte_regulation	NA
HLA-DQA2	major histocompatibility complex class II DQ alpha 2	Antigen_processing	Lymphocyte_regulation	NA
HLA-B	major histocompatibility complex class I B	Antigen_processing	Lymphocyte_regulation	NA
HLA-G	major histocompatibility complex class I G	Antigen_processing	Lymphocyte_regulation	NA
HLA-DMB	major histocompatibility complex class II DM beta	Antigen_processing	Lymphocyte_regulation	NA
HLA-DPA1	major histocompatibility complex class II DP alpha 1	Antigen_processing	Lymphocyte_regulation	NA
HLA-DQA1	major histocompatibility complex class II DQ alpha 1	Antigen_processing	Lymphocyte_regulation	NA
HLA-DRB1	major histocompatibility complex class II DR beta 1	Antigen_processing	Lymphocyte_regulation	NA
GADD45GIP1	GADD45G interacting protein 1	Apoptosis	Tumor_characterization	NA
BCL2	B-cell CLL lymphoma 2	Apoptosis	Tumor_characterization	NA
TNFSF10	tumor necrosis factor superfamily member 10	Apoptosis	Tumor_characterization	NA
BCL2L11	BCL2 like 11	Apoptosis	Tumor_characterization	NA
TNFRSF17	tumor necrosis factor receptor superfamily member 17	B_cell_marker	Lymphocyte_markers	stimulatory
FCGR2B	Fc fragment of IgG receptor IIb	B_cell_marker	Lymphocyte_markers	NA
POU2AF1	POU class 2 associating factor 1	B_cell_marker	Lymphocyte_markers	NA
TNFSF13B	tumor necrosis factor superfamily member 13b	B_cell_marker	Lymphocyte_markers	stimulatory
JCHAIN	joining chain of multimeric IgA and IgM	B_cell_marker	Lymphocyte_markers	NA
CD22	CD22 molecule	B_cell_marker	Lymphocyte_markers	NA
NTN3	netrin 3	B_cell_marker	Lymphocyte_markers	NA
SKAP2	src kinase associated phosphoprotein 2	B_cell_marker	Lymphocyte_markers	NA
CD19	CD19 molecule	B_cell_marker	Lymphocyte_markers	NA
FCRLA	Fc receptor like A	B_cell_marker	Lymphocyte_markers	NA
FCGR1A	Fc fragment of IgG receptor Ia	B_cell_marker	Lymphocyte_markers	NA
SLAMF7	SLAM family member 7	B_cell_marker	Lymphocyte_markers	NA
CD79A	CD79a molecule	B_cell_receptor_signaling	Lymphocyte_regulation	NA
FAS	Fas cell surface death receptor	B_cell_receptor_signaling	Lymphocyte_regulation	NA
CD79B	CD79b molecule	B_cell_receptor_signaling	Lymphocyte_regulation	NA
CTLA4	cytotoxic T-lymphocyte associated protein 4	Checkpoint_pathway	Checkpoint_pathway	Inhibitory
IDO1	indoleamine 23-dioxygenase 1	Checkpoint_pathway	Checkpoint_pathway	Inhibitory
CD27	CD27 molecule	Checkpoint_pathway	Checkpoint_pathway	stimulatory
IL12A	interleukin 12A	Checkpoint_pathway	Checkpoint_pathway	stimulatory
CD70	CD70 molecule	Checkpoint_pathway	Checkpoint_pathway	stimulatory
IL2	interleukin 2	Checkpoint_pathway	Checkpoint_pathway	stimulatory
CD40	CD40 molecule	Checkpoint_pathway	Checkpoint_pathway	stimulatory
IL10	interleukin 10	Checkpoint_pathway	Checkpoint_pathway	Inhibitory
LAG3	lymphocyte activating 3	Checkpoint_pathway	Checkpoint_pathway	Inhibitory
PDCD1	programmed cell death 1	Checkpoint_pathway	Checkpoint_pathway	Inhibitory
KIR2DL1	killer cell immunoglobulin like receptor two Ig domains and long cytopla	Checkpoint_pathway	Checkpoint_pathway	Inhibitory
TNFRSF4	tumor necrosis factor receptor superfamily member 4	Checkpoint_pathway	Checkpoint_pathway	stimulatory
TNFRSF9	tumor necrosis factor receptor superfamily member 9	Checkpoint_pathway	Checkpoint_pathway	stimulatory
ADORA2A	adenosine A2a receptor	Checkpoint_pathway	Checkpoint_pathway	inhibitory
TNFSF18	tumor necrosis factor superfamily member 18	Checkpoint_pathway	Checkpoint_pathway	stimulatory
CD80	CD80 molecule	Checkpoint_pathway	Checkpoint_pathway	stimulatory
TNFRSF14	tumor necrosis factor receptor superfamily member 14	Checkpoint_pathway	Checkpoint_pathway	stimulatory
ICOS	inducible T-cell costimulator	Checkpoint_pathway	Checkpoint_pathway	stimulatory
CD48	CD48 molecule	Checkpoint_pathway	Checkpoint_pathway	stimulatory
ICOSLG	inducible T-cell costimulator ligand	Checkpoint_pathway	Checkpoint_pathway	stimulatory
CD244	CD244 molecule	Checkpoint_pathway	Checkpoint_pathway	inhibitory
CD274	CD274 molecule	Checkpoint_pathway	Checkpoint_pathway	inhibitory
BTLA	B and T lymphocyte associated	Checkpoint_pathway	Checkpoint_pathway	inhibitory
C10orf54	chromosome 10 open reading frame 54	Checkpoint_pathway	Checkpoint_pathway	stimulatory
PDCD1LG2	programmed cell death 1 ligand 2	Checkpoint_pathway	Checkpoint_pathway	inhibitory
TNFSF4	tumor necrosis factor superfamily member 4	Checkpoint_pathway	Checkpoint_pathway	stimulatory
CD86	CD86 molecule	Checkpoint_pathway	Checkpoint_pathway	stimulatory
EOMES	eomesodermin	Checkpoint_pathway	Checkpoint_pathway	stimulatory
CD69	CD69 molecule	Checkpoint_pathway	Checkpoint_pathway	stimulatory
ENTPD1	ectonucleoside triphosphate diphosphohydrolase 1	Checkpoint_pathway	Checkpoint_pathway	stimulatory
TNFSF14	tumor necrosis factor superfamily member 14	Checkpoint_pathway	Checkpoint_pathway	stimulatory
CD276	CD276 molecule	Checkpoint_pathway	Checkpoint_pathway	stimulatory
VTCN1	V-set domain containing T cell activation inhibitor 1	Checkpoint_pathway	Checkpoint_pathway	inhibitory
NT5E	5-nucleotidase ecto	Checkpoint_pathway	Checkpoint_pathway	stimulatory
CEACAM1	carcinoembryonic antigen related cell adhesion molecule 1	Checkpoint_pathway	Checkpoint_pathway	inhibitory
TNF	tumor necrosis factor	Checkpoint_pathway	Checkpoint_pathway	stimulatory
IDO2	indoleamine 23-dioxygenase 2	Checkpoint_pathway	Checkpoint_pathway	Inhibitory
TDO2	tryptophan 23-dioxygenase	Checkpoint_pathway	Checkpoint_pathway	inhibitory
PVR	poliovirus receptor	Checkpoint_pathway	Checkpoint_pathway	stimulatory
CD28	CD28 molecule	Checkpoint_pathway	Checkpoint_pathway	stimulatory
HAVCR2	hepatitis A virus cellular receptor 2	Checkpoint_pathway	Checkpoint_pathway	inhibitory
CD160	CD160 molecule	Checkpoint_pathway	Checkpoint_pathway	inhibitory
TGFB1	transforming growth factor beta 1	Checkpoint_pathway	Checkpoint_pathway	Inhibitory
CXCL1	C-X-C motif chemokine ligand 1	Chemokine_signaling	Cytokine_signaling	NA
NCF1	neutrophil cytosolic factor 1	Chemokine_signaling	Cytokine_signaling	NA
CCL20	C-C motif chemokine ligand 20	Chemokine_signaling	Cytokine_signaling	NA
CCL22	C-C motif chemokine ligand 22	Chemokine_signaling	Cytokine_signaling	NA
CXCR3	C-X-C motif chemokine receptor 3	Chemokine_signaling	Cytokine_signaling	NA
CCR6	C-C motif chemokine receptor 6	Chemokine_signaling	Cytokine_signaling	NA
VEGFA	vascular endothelial growth factor A	Chemokine_signaling	Cytokine_signaling	NA
CXCR2	C-X-C motif chemokine receptor 2	Chemokine_signaling	Cytokine_signaling	NA
CCR4	C-C motif chemokine receptor 4	Chemokine_signaling	Cytokine_signaling	NA
CCL17	C-C motif chemokine ligand 17	Chemokine_signaling	Cytokine_signaling	NA
TNFSF9	tumor necrosis factor superfamily member 9	Cytokine_signaling	Cytokine_signaling	stimulatory
IL21	interleukin 21	Cytokine_signaling	Cytokine_signaling	NA
STAT5A	signal transducer and activator of transcription 5A	Cytokine_signaling	Cytokine_signaling	NA
IFIT2	interferon induced protein with tetratricopeptide repeats 2	Cytokine_signaling	Cytokine_signaling	NA
CSF2RB	colony stimulating factor 2 receptor beta common subunit	Cytokine_signaling	Cytokine_signaling	NA
IL7	interleukin 7	Cytokine_signaling	Cytokine_signaling	NA
CXCL8	C-X-C motif chemokine ligand 8	Cytokine_signaling	Cytokine_signaling	NA
IL4	interleukin 4	Cytokine_signaling	Cytokine_signaling	NA
CCR1	C-C motif chemokine receptor 1	Cytokine_signaling	Cytokine_signaling	NA
CSF1R	colony stimulating factor 1 receptor	Cytokine_signaling	Cytokine_signaling	inhibitory
IL2RA	interleukin 2 receptor subunit alpha	Cytokine_signaling	Cytokine_signaling	stimulatory
HGF	hepatocyte growth factor	Cytokine_signaling	Cytokine_signaling	NA
IL1A	interleukin 1 alpha	Cytokine_signaling	Cytokine_signaling	NA
IL6	interleukin 6	Cytokine_signaling	Cytokine_signaling	stimulatory
IL13	interleukin 13	Cytokine_signaling	Cytokine_signaling	NA
STAT3	signal transducer and activator of transcription 3	Cytokine_signaling	Cytokine_signaling	NA
TNFRSF18	tumor necrosis factor receptor superfamily member 18	Cytokine_signaling	Cytokine_signaling	stimulatory
HERC6	HECT and RLD domain containing E3 ubiquitin protein ligase family mem	Dendritic_cell	Lymphocyte_markers	NA
CLEC4C	C-type lectin domain family 4 member C	Dendritic_cell	Lymphocyte_markers	NA
TLR3	toll like receptor 3	Dendritic_cell	Lymphocyte_markers	NA
IL3RA	interleukin 3 receptor subunit alpha	Dendritic_cell	Lymphocyte_markers	NA
ITGAX	integrin subunit alpha X	Dendritic_cell	Lymphocyte_markers	NA
NRP1	neuropilin 1	Dendritic_cell	Lymphocyte_markers	NA
ZBTB46	zinc finger and BTB domain containing 46	Dendritic_cell	Lymphocyte_markers	NA
IL17F	interleukin 17F	Dendritic_cell_macrophage	Lymphocyte_markers	NA
CMKLR1	chemerin chemokine-like receptor 1	Dendritic_cell_macrophage	Lymphocyte_markers	NA
CD209	CD209 molecule	Dendritic_cell_macrophage	Lymphocyte_markers	NA
IL23A	interleukin 23 subunit alpha	Dendritic_cell_macrophage	Lymphocyte_markers	NA
MRC1	mannose receptor C type 1	Dendritic_cell_macrophage	Lymphocyte_markers	NA
CD14	CD14 molecule	Dendritic_cell_macrophage	Lymphocyte_markers	NA
IL17A	interleukin 17A	Helper_T_cells	Lymphocyte_markers	NA
BATF	basic leucine zipper ATF-like transcription factor	Helper_T_cells	Lymphocyte_markers	NA
CCR2	C-C motif chemokine receptor 2	Helper_T_cells	Lymphocyte_markers	NA
STAT6	signal transducer and activator of transcription 6	Helper_T_cells	Lymphocyte_markers	NA
GATA3	GATA binding protein 3	Helper_T_cells	Lymphocyte_markers	NA
CD4	CD4 molecule	Helper_T_cells	Lymphocyte_markers	NA
STAT4	signal transducer and activator of transcription 4	Helper_T_cells	Lymphocyte_markers	NA
RORC	RAR related orphan receptor C	Helper_T_cells	Lymphocyte_markers	NA
ABCF1	ATP binding cassette subfamily F member 1	Housekeeping	Housekeeping	NA
G6PD	glucose-6-phosphate dehydrogenase	Housekeeping	Housekeeping	NA
GUSB	glucuronidase beta	Housekeeping	Housekeeping	NA
HMBS	hydroxymethylbilane synthase	Housekeeping	Housekeeping	NA
LMNA	lamin A C	Housekeeping	Housekeeping	NA
LRP1	LDL receptor related protein 1	Housekeeping	Housekeeping	NA
POLR2A	polymerase RNA II subunit A	Housekeeping	Housekeeping	NA
SDHA	succinate dehydrogenase complex flavoprotein subunit A	Housekeeping	Housekeeping	NA
TBP	TATA-box binding protein	Housekeeping	Housekeeping	NA
TFRC	transferrin receptor	Housekeeping	Housekeeping	NA
TUBB	tubulin beta class I	Housekeeping	Housekeeping	NA
IFIH1	interferon induced with helicase C domain 1	Innate_immune_response	Lymphocyte_regulation	NA
LYZ	lysozyme	Innate_immune_response	Lymphocyte_regulation	NA
NOS2	nitric oxide synthase 2	Innate_immune_response	Lymphocyte_regulation	NA
C1QA	complement component 1 q subcomponent A chain	Innate_immune_response	Lymphocyte_regulation	NA
TLR7	toll like receptor 7	Innate_immune_response	Lymphocyte_regulation	NA
C1QB	complement component 1 q subcomponent B chain	Innate_immune_response	Lymphocyte_regulation	NA
MAPK14	mitogen-activated protein kinase 14	Innate_immune_response	Lymphocyte_regulation	NA
AXL	AXL receptor tyrosine kinase	Innate_immune_response	Lymphocyte_regulation	NA
MIF	macrophage migration inhibitory factor glycosylation-inhibiting factor	Innate_immune_response	Lymphocyte_regulation	NA
DMBT1	deleted in malignant brain tumors 1	Innate_immune_response	Lymphocyte_regulation	NA
LCN2	lipocalin 2	Innate_immune_response	Lymphocyte_regulation	NA
TLR9	toll like receptor 9	Innate_immune_response	Lymphocyte_regulation	NA
IRF4	interferon regulatory factor 4	Interferon_signaling	Cytokine_signaling	NA
OAS2	2-5-oligoadenylate synthetase 2	Interferon_signaling	Cytokine_signaling	NA
DDX58	DEXD H-box helicase 58	Interferon_signaling	Cytokine_signaling	NA
IFI35	interferon induced protein 35	Interferon_signaling	Cytokine_signaling	NA
IFI44L	interferon induced protein 44 like	Interferon_signaling	Cytokine_signaling	NA
IFI6	interferon alpha inducible protein 6	Interferon_signaling	Cytokine_signaling	NA
MX1	MX dynamin like GTPase 1	Interferon_signaling	Cytokine_signaling	NA
OAS3	2-5-oligoadenylate synthetase 3	Interferon_signaling	Cytokine_signaling	NA
LILRB1	leukocyte immunoglobulin like receptor B1	Leukocyte_inhibition	Lymphocyte_regulation	NA
LST1	leukocyte specific transcript 1	Leukocyte_inhibition	Lymphocyte_regulation	NA
ITGAL	integrin subunit alpha L	Leukocyte_migration	Lymphocyte_regulation	NA
SELL	selectin L	Leukocyte_migration	Lymphocyte_regulation	NA
ITGB7	integrin subunit beta 7	Leukocyte_migration	Lymphocyte_regulation	NA
VCAM1	vascular cell adhesion molecule 1	Leukocyte_migration	Lymphocyte_regulation	NA
ITGAM	integrin subunit alpha M	Leukocyte_migration	Lymphocyte_regulation	NA
SH2D1B	SH2 domain containing 1B	Lymphocyte_activation	Lymphocyte_regulation	inhibitory
SH2D1A	SH2 domain containing 1A	Lymphocyte_activation	Lymphocyte_regulation	inhibitory
IKZF4	IKAROS family zinc finger 4	Lymphocyte_development	Lymphocyte_regulation	NA
IKZF2	IKAROS family zinc finger 2	Lymphocyte_development	Lymphocyte_regulation	NA
IKZF1	IKAROS family zinc finger 1	Lymphocyte_development	Lymphocyte_regulation	NA
NKG7	natural killer cell granule protein 7	Lymphocyte_infiltrate	Lymphocyte_regulation	stimulatory
GZMB	granzyme B	Lymphocyte_infiltrate	Lymphocyte_regulation	stimulatory
CCR5	C-C motif chemokine receptor 5 gene pseudogene	Lymphocyte_infiltrate	Lymphocyte_regulation	stimulatory
GZMA	granzyme A	Lymphocyte_infiltrate	Lymphocyte_regulation	stimulatory
IL2RG	interleukin 2 receptor subunit gamma	Lymphocyte_infiltrate	Lymphocyte_regulation	NA
CCL5	C-C motif chemokine ligand 5	Lymphocyte_infiltrate	Lymphocyte_regulation	NA
CCL4	C-C motif chemokine ligand 4	Lymphocyte_infiltrate	Lymphocyte_regulation	NA
PTPN7	protein tyrosine phosphatase non-receptor type 7	Lymphocyte_infiltrate	Lymphocyte_regulation	NA
SRGN	serglycin	Lymphocyte_infiltrate	Lymphocyte_regulation	stimulatory
TARP	TCR gamma alternate reading frame protein	Lymphocyte_infiltrate	Lymphocyte_regulation	NA
TNFAIP8	TNF alpha induced protein 8	Lymphocyte_infiltrate	Lymphocyte_regulation	NA
SAMHD1	SAM and HD domain containing deoxynucleoside triphosphate triphosph	Lymphocyte_infiltrate	Lymphocyte_regulation	stimulatory
IL10RA	interleukin 10 receptor subunit alpha	Lymphocyte_infiltrate	Lymphocyte_regulation	inhibitory
CD2	CD2 molecule	Lymphocyte_infiltrate	Lymphocyte_regulation	NA
CORO1A	coronin 1A	Lymphocyte_infiltrate	Lymphocyte_regulation	NA
GZMH	granzyme H	Lymphocyte_infiltrate	Lymphocyte_regulation	stimulatory
FYB	FYN binding protein	Lymphocyte_infiltrate	Lymphocyte_regulation	stimulatory
GZMK	granzyme K	Lymphocyte_infiltrate	Lymphocyte_regulation	stimulatory
CCL3	C-C motif chemokine ligand 3	Lymphocyte_infiltrate	Lymphocyte_regulation	stimulatory
PTPRC	protein tyrosine phosphatase receptor type C	Lymphocyte_infiltrate	Lymphocyte_regulation	stimulatory
SIT1	signaling threshold regulating transmembrane adaptor 1	Lymphocyte_infiltrate	Lymphocyte_regulation	inhibitory
CTSS	cathepsin S	Lymphocyte_infiltrate	Lymphocyte_regulation	stimulatory
LILRB2	leukocyte immunoglobulin like receptor B2	Lymphocyte_infiltrate	Lymphocyte_regulation	inhibitory
CCL21	C-C motif chemokine ligand 21	Lymphocyte_infiltrate	Lymphocyte_regulation	stimulatory
CD52	CD52 molecule	Lymphocyte_infiltrate	Lymphocyte_regulation	NA
TYROBP	TYRO protein tyrosine kinase binding protein	Lymphocyte_infiltrate	Lymphocyte_regulation	stimulatory
CD63	CD63 molecule	Lymphocyte_infiltrate	Lymphocyte_regulation	stimulatory
TAGAP	T-cell activation RhoGTPase activating protein	Lymphocyte_infiltrate	Lymphocyte_regulation	stimulatory
LAMP1	lysosomal associated membrane protein 1	Lymphocyte_infiltrate	Lymphocyte_regulation	NA
LAPTM5	lysosomal protein transmembrane 5	Lymphocyte_infiltrate	Lymphocyte_regulation	NA
IGSF6	immunoglobulin superfamily member 6	Lymphocyte_infiltrate	Lymphocyte_regulation	NA
CXCR4	C-X-C motif chemokine receptor 4	Lymphocyte_infiltrate	Lymphocyte_regulation	stimulatory
CCL18	C-C motif chemokine ligand 18	Lymphocyte_infiltrate	Lymphocyte_regulation	stimulatory
CX3CR1	C-X3-C motif chemokine receptor 1	Lymphocyte_infiltrate	Lymphocyte_regulation	stimulatory
JAML	junction adhesion molecule like	Lymphocyte_infiltrate	Lymphocyte_regulation	stimulatory
ITGB2	integrin subunit beta 2	Lymphocyte_infiltrate	Lymphocyte_regulation	stimulatory
CXCR6	C-X-C motif chemokine receptor 6	Lymphocyte_infiltrate	Lymphocyte_regulation	stimulatory
CCL2	C-C motif chemokine ligand 2	Lymphocyte_infiltrate	Lymphocyte_regulation	stimulatory
SLAMF8	SLAM family member 8	Lymphocyte_infiltrate	Lymphocyte_regulation	stimulatory
FCER1G	Fc fragment of IgE receptor Ig	Lymphocyte_infiltrate	Lymphocyte_regulation	stimulatory
TLR8	toll like receptor 8	Lymphocyte_infiltrate	Lymphocyte_regulation	stimulatory
CD37	CD37 molecule	Lymphocyte_infiltrate	Lymphocyte_regulation	stimulatory
LY9	lymphocyte antigen 9	Lymphocyte_infiltrate	Lymphocyte_regulation	inhibitory
ALOX15B	arachidonate 15-lipoxygenase type B	Macrophage	Lymphocyte_markers	NA
CD163	CD163 molecule	Macrophage	Lymphocyte_markers	NA
AIF1	allograft inflammatory factor 1	Macrophage	Lymphocyte_markers	NA
FCGR3A	Fc fragment of IgG receptor IIIa	Macrophage	Lymphocyte_markers	NA
CD68	CD68 molecule	Macrophage	Lymphocyte_markers	NA
CEACAM8	carcinoembryonic antigen related cell adhesion molecule 8	Myeloid_marker	Lymphocyte_markers	NA
ARG1	arginase 1	Myeloid_marker	Lymphocyte_markers	stimulatory
FUT4	fucosyltransferase 4	Myeloid_marker	Lymphocyte_markers	NA
S100A9	S100 calcium binding protein A9	Myeloid_marker	Lymphocyte_markers	NA
S100A8	S100 calcium binding protein A8	Myeloid_marker	Lymphocyte_markers	NA
MPO	myeloperoxidase	Myeloid_marker	Lymphocyte_markers	NA
CD33	CD33 molecule	Myeloid_marker	Lymphocyte_markers	NA
KREMEN1	kringle containing transmembrane protein 1	Neutrophil	Lymphocyte_markers	NA
PYGL	phosphorylase glycogen liver	Neutrophil	Lymphocyte_markers	NA
CA4	carbonic anhydrase 4	Neutrophil	Lymphocyte_markers	NA
DGAT2	diacylglycerol O-acyltransferase 2	Neutrophil	Lymphocyte_markers	NA
LRG1	leucine rich alpha-2-glycoprotein 1	Neutrophil	Lymphocyte_markers	NA
GNLY	granulysin	NK_activation	Lymphocyte_markers	NA
PRF1	perforin 1	NK_activation	Lymphocyte_markers	NA
KLRK1	killer cell lectin like receptor K1	NK_activation	Lymphocyte_markers	stimulatory
KLRG1	killer cell lectin like receptor G1	NK_activation	Lymphocyte_markers	NA
KLRB1	killer cell lectin like receptor B1	NK_activation	Lymphocyte_markers	NA
FCGR3B	Fc fragment of IgG receptor IIIb	NK_activation	Lymphocyte_markers	NA
B3GAT1	beta-13-glucuronyltransferase 1	NK_activation	Lymphocyte_markers	NA
KLRF1	killer cell lectin like receptor F1	NK_activation	Lymphocyte_markers	NA
KLRD1	killer cell lectin like receptor D1	NK_activation	Lymphocyte_markers	NA
IL12B	interleukin 12B	NK_activation	Lymphocyte_markers	NA
KIR2DL3	killer cell immunoglobulin like receptor two Ig domains and long cytopla	NK_cell_marker	Lymphocyte_markers	NA
NCR1	natural cytotoxicity triggering receptor 1	NK_cell_marker	Lymphocyte_markers	NA
KIR2DL2	killer cell immunoglobulin like receptor two Ig domains and long cytopla	NK_cell_marker	Lymphocyte_markers	inhibitory
NCR3	natural cytotoxicity triggering receptor 3	NK_cell_marker	Lymphocyte_markers	NA
MTOR	mechanistic target of rapamycin	PD_1_signaling	Checkpoint_pathway	NA
PIK3CD	phosphatidylinositol-45-bisphosphate 3-kinase catalytic subunit delta	PD_1_signaling	Checkpoint_pathway	NA
PRDM1	PR domain 1	PD_1_signaling	Checkpoint_pathway	NA
PIK3CA	phosphatidylinositol-45-bisphosphate 3-kinase catalytic subunit alpha	PD_1_signaling	Checkpoint_pathway	NA
PTPN11	protein tyrosine phosphatase non-receptor type 11	PD_1_signaling	Checkpoint_pathway	NA
NFATC1	nuclear factor of activated T-cells 1	PD_1_signaling	Checkpoint_pathway	NA
HIF1A	hypoxia inducible factor 1 alpha subunit	PD_1_signaling	Checkpoint_pathway	NA
FOXO1	forkhead box O1	PD_1_signaling	Checkpoint_pathway	NA
PTEN	phosphatase and tensin homolog	PD_1_signaling	Checkpoint_pathway	NA
CCNB2	cyclin B2	Proliferation	Tumor_characterization	NA
MAD2L1	MAD2 mitotic arrest deficient-like 1 yeast	Proliferation	Tumor_characterization	NA
FOXM1	forkhead box M1	Proliferation	Tumor_characterization	NA
MELK	maternal embryonic leucine zipper kinase	Proliferation	Tumor_characterization	NA
TOP2A	topoisomerase DNA II alpha	Proliferation	Tumor_characterization	NA
CDKN3	cyclin-dependent kinase inhibitor 3	Proliferation	Tumor_characterization	NA
MKI67	marker of proliferation Ki-67	Proliferation	Tumor_characterization	NA
CDK1	cyclin-dependent kinase 1	Proliferation	Tumor_characterization	NA
KIAA0101	KIAA0101	Proliferation	Tumor_characterization	NA
BUB1	BUB1 mitotic checkpoint serine threonine kinase	Proliferation	Tumor_characterization	NA
EGR2	early growth response 2	T_cell_differentiation	Lymphocyte_markers	NA
LEXM	lymphocyte expansion molecule	T_cell_differentiation	Lymphocyte_markers	NA
ZAP70	zeta chain of T cell receptor associated protein kinase 70kDa	T_cell_receptor_signaling	Lymphocyte_regulation	stimulatory
IFNA17	interferon alpha 17	T_cell_receptor_signaling	Lymphocyte_regulation	NA
PTPN6	protein tyrosine phosphatase non-receptor type 6	T_cell_receptor_signaling	Lymphocyte_regulation	NA
CD40LG	CD40 ligand	T_cell_receptor_signaling	Lymphocyte_regulation	stimulatory
CBLB	Cbl proto-oncogene B	T_cell_receptor_signaling	Lymphocyte_regulation	inhibitory
NFKBIA	NFKB inhibitor alpha	T_cell_receptor_signaling	Lymphocyte_regulation	NA
IL22	interleukin 22	T_cell_regulation	Lymphocyte_regulation	NA
ID3	inhibitor of DNA binding 3 HLH protein	T_cell_regulation	Lymphocyte_regulation	NA
FOXP3	forkhead box P3	T_cell_regulation	Lymphocyte_regulation	NA
KLF2	Kruppel like factor 2	T_cell_regulation	Lymphocyte_regulation	NA
IL18	interleukin 18	T_cell_regulation	Lymphocyte_regulation	NA
M6PR	mannose-6-phosphate receptor cation dependent	T_cell_regulation	Lymphocyte_regulation	NA
ID2	inhibitor of DNA binding 2 HLH protein	T_cell_regulation	Lymphocyte_regulation	NA
EBI3	Epstein-Barr virus induced 3	T_cell_regulation	Lymphocyte_regulation	NA
IL15	interleukin 15	T_cell_regulation	Lymphocyte_regulation	NA
GRAP2	GRB2-related adaptor protein 2	TCR_coexpression	Lymphocyte_regulation	NA
TIGIT	T-cell immunoreceptor with Ig and ITIM domains	TCR_coexpression	Lymphocyte_regulation	inhibitory
CD247	CD247 molecule	TCR_coexpression	Lymphocyte_regulation	NA
IL2RB	interleukin 2 receptor subunit beta	TCR_coexpression	Lymphocyte_regulation	NA
CRTAM	cytotoxic and regulatory T-cell molecule	TCR_coexpression	Lymphocyte_regulation	NA
CD3G	CD3g molecule	TCR_coexpression	Lymphocyte_regulation	NA
LAMP3	lysosomal associated membrane protein 3	TCR_coexpression	Lymphocyte_regulation	NA
CD8A	CD8a molecule	TCR_coexpression	Lymphocyte_regulation	NA
GPR18	G protein-coupled receptor 18	TCR_coexpression	Lymphocyte_regulation	NA
CD3D	CD3d molecule	TCR_coexpression	Lymphocyte_regulation	NA
CD8B	CD8b molecule	TCR_coexpression	Lymphocyte_regulation	NA
CD3E	CD3e molecule	TCR_coexpression	Lymphocyte_regulation	NA
IKZF3	IKAROS family zinc finger 3	TCR_coexpression	Lymphocyte_regulation	NA
ITK	IL2 inducible T-cell kinase	TCR_coexpression	Lymphocyte_regulation	NA
PTPRCAP	protein tyrosine phosphatase receptor type C associated protein	TCR_coexpression	Lymphocyte_regulation	NA
CD6	CD6 molecule	TCR_coexpression	Lymphocyte_regulation	NA
IL7R	interleukin 7 receptor	TCR_coexpression	Lymphocyte_regulation	NA
CCR7	C-C motif chemokine receptor 7	TCR_coexpression	Lymphocyte_regulation	NA
LCK	LCK proto-oncogene Src family tyrosine kinase	TCR_coexpression	Lymphocyte_regulation	NA
CTAG1B	cancer testis antigen 1B	Tumor_antigen	Tumor_characterization	NA
CTAG2	cancer testis antigen 2	Tumor_antigen	Tumor_characterization	NA
XAGE1B	X antigen family member 1B	Tumor_antigen	Tumor_characterization	NA
GAGE12J	G antigen 12J	Tumor_antigen	Tumor_characterization	NA
MLANA	melan-A	Tumor_antigen	Tumor_characterization	NA
MAGEA10	MAGE family member A10	Tumor_antigen	Tumor_characterization	NA
MAGEA4	MAGE family member A4	Tumor_antigen	Tumor_characterization	NA
SSX2	SSX family member 2	Tumor_antigen	Tumor_characterization	NA
MAGEA12	MAGE family member A12	Tumor_antigen	Tumor_characterization	NA
MAGEA3	MAGE family member A3	Tumor_antigen	Tumor_characterization	NA
GAGE10	G antigen 10	Tumor_antigen	Tumor_characterization	NA
MAGEC2	MAGE family member C2	Tumor_antigen	Tumor_characterization	NA
BAGE	B melanoma antigen	Tumor_antigen	Tumor_characterization	NA
GAGE2C,GAGE2A,GAGE2E	G antigen 2C	Tumor_antigen	Tumor_characterization	NA
GAGE13	G antigen 13	Tumor_antigen	Tumor_characterization	NA
MAGEA1	MAGE family member A1	Tumor_antigen	Tumor_characterization	NA
GAGE1,GAGE12I,GAGE12F	G antigen 1	Tumor_antigen	Tumor_characterization	NA
PMEL	premelanosome protein	Tumor_marker	Tumor_characterization	NA
MS4A1	membrane spanning 4-domains A1	Tumor_marker	Tumor_characterization	NA
MYC	v-myc avian myelocytomatosis viral oncogene homolog	Tumor_marker	Tumor_characterization	NA
PTK7	protein tyrosine kinase 7 inactive	Tumor_marker	Tumor_characterization	NA
BRCA1	BRCA1 DNA repair associated	Tumor_marker	Tumor_characterization	NA
PGF	placental growth factor	Tumor_marker	Tumor_characterization	NA
IRS1	insulin receptor substrate 1	Tumor_marker	Tumor_characterization	NA
PTGS2	prostaglandin-endoperoxide synthase 2	Tumor_marker	Tumor_characterization	NA
SNAI2	snail family transcriptional repressor 2	Tumor_marker	Tumor_characterization	NA
MMP9	matrix metallopeptidase 9	Tumor_marker	Tumor_characterization	NA
MMP2	matrix metallopeptidase 2	Tumor_marker	Tumor_characterization	NA
RB1	RB transcriptional corepressor 1	Tumor_marker	Tumor_characterization	NA
MAPK1	mitogen-activated protein kinase 1	Tumor_marker	Tumor_characterization	NA
BRCA2	BRCA2 DNA repair associated	Tumor_marker	Tumor_characterization	NA
ZEB1	zinc finger E-box binding homeobox 1	Tumor_marker	Tumor_characterization	NA
TCF7	transcription factor 7 T-cell specific HMG-box	Tumor_marker	Tumor_characterization	NA
TRIM29	tripartite motif containing 29	Tumor_marker	Tumor_characterization	NA
EFNA4	ephrin A4	Tumor_marker	Tumor_characterization	NA
EGR3	early growth response 3	Tumor_marker	Tumor_characterization	NA
EGFR	epidermal growth factor receptor	Tumor_marker	Tumor_characterization	NA
KRT7	keratin 7	Tumor_marker	Tumor_characterization	NA
AKT1	AKT serine threonine kinase 1	Tumor_marker	Tumor_characterization	NA
TWIST1	twist family bHLH transcription factor 1	Tumor_marker	Tumor_characterization	NA
CDKN2A	cyclin-dependent kinase inhibitor 2A	Tumor_marker	Tumor_characterization	NA
KRT5	keratin 5	Tumor_marker	Tumor_characterization	NA
RPS6	ribosomal protein S6	Tumor_marker	Tumor_characterization	NA
SNAI1	snail family transcriptional repressor 1	Tumor_marker	Tumor_characterization	NA
NOTCH3	notch 3	Tumor_marker	Tumor_characterization	NA
TP63	tumor protein p63	Tumor_marker	Tumor_characterization	NA
IFITM1	interferon induced transmembrane protein 1	Type_I_interferon_signaling	Cytokine_signaling	NA
ISG20	interferon stimulated exonuclease gene 20	Type_I_interferon_signaling	Cytokine_signaling	NA
BST2	bone marrow stromal cell antigen 2	Type_I_interferon_signaling	Cytokine_signaling	NA
IFIT1	interferon induced protein with tetratricopeptide repeats 1	Type_I_interferon_signaling	Cytokine_signaling	NA
ISG15	ISG15 ubiquitin-like modifier	Type_I_interferon_signaling	Cytokine_signaling	NA
IFIT3	interferon induced protein with tetratricopeptide repeats 3	Type_I_interferon_signaling	Cytokine_signaling	NA
IFI27	interferon alpha inducible protein 27	Type_I_interferon_signaling	Cytokine_signaling	NA
IFITM2	interferon induced transmembrane protein 2	Type_I_interferon_signaling	Cytokine_signaling	NA
IRF9	interferon regulatory factor 9	Type_II_interferon_signaling	Cytokine_signaling	NA
IRF1	interferon regulatory factor 1	Type_II_interferon_signaling	Cytokine_signaling	NA
GBP1	guanylate binding protein 1	Type_II_interferon_signaling	Cytokine_signaling	NA
STAT1	signal transducer and activator of transcription 1	Type_II_interferon_signaling	Cytokine_signaling	NA
FASLG	Fas ligand	Type_II_interferon_signaling	Cytokine_signaling	NA
TAP1	transporter 1 ATP-binding cassette sub-family B MDR TAP	Type_II_interferon_signaling	Cytokine_signaling	NA
CXCL13	C-X-C motif chemokine ligand 13	Type_II_interferon_signaling	Cytokine_signaling	NA
EIF2AK2	eukaryotic translation initiation factor 2 alpha kinase 2	Type_II_interferon_signaling	Cytokine_signaling	NA
IFNG	interferon gamma	Type_II_interferon_signaling	Cytokine_signaling	NA
PSMB9	proteasome subunit beta 9	Type_II_interferon_signaling	Cytokine_signaling	NA
CXCL9	C-X-C motif chemokine ligand 9	Type_II_interferon_signaling	Cytokine_signaling	NA
CIITA	class II major histocompatibility complex transactivator	Type_II_interferon_signaling	Cytokine_signaling	NA
OAS1	2-5-oligoadenylate synthetase 1	Type_II_interferon_signaling	Cytokine_signaling	NA
CXCL10	C-X-C motif chemokine ligand 10	Type_II_interferon_signaling	Cytokine_signaling	NA
TBX21	T-box 21	Type_II_interferon_signaling	Cytokine_signaling	NA
CXCL11	C-X-C motif chemokine ligand 11	Type_II_interferon_signaling	Cytokine_signaling	NA
CYBB	cytochrome b-245 beta chain	Type_II_interferon_signaling	Cytokine_signaling	NA
ICAM1	intercellular adhesion molecule 1	Type_II_interferon_signaling	Cytokine_signaling	NA
IL1B	interleukin 1 beta	Type_II_interferon_signaling	Cytokine_signaling	NA
CXCR5	C-X-C motif chemokine receptor 5	Type_II_interferon_signaling	Cytokine_signaling	NA
BCL6	B-cell CLL lymphoma 6	Type_II_interferon_signaling	Cytokine_signaling	NA
IFNB1	interferon beta 1	Type_II_interferon_signaling	Cytokine_signaling	NA
CX3CL1	C-X3-C motif chemokine ligand 1	Type_II_interferon_signaling	Cytokine_signaling	NA
